# Supplementary material
Source: publisher figshare collection journal article supplement (https://acs.figshare.com/ndownloader/files/4618744)
Supplement: Supplementary file 1 [file 4618744]

## Supporting Information

### **PENTACHLOROPHENOL AND OTHER CHLORINATED PHENOLS ARE SUBSTRATES FOR HUMAN HYDROXYSTEROID SULFOTRANSFERASE hSULT2A1**

Hayrettin Ozan Gulcan, Yungang Liu and Michael W. Duffel\*

Division of Medicinal and Natural Products Chemistry, College of Pharmacy, The  
University of Iowa, Iowa City, IA 52242

Supporting information available:

|                                                                                   |   |
|-----------------------------------------------------------------------------------|---|
| <b>Table S1.</b> Summary of the purification of hSULT2A1.                         | 2 |
| <b>Figure S1.</b> Elution profile of DE-52 column.                                | 3 |
| <b>Figure S2.</b> Elution profile of the first hydroxyapatite column.             | 4 |
| <b>Figure S3.</b> Elution profile of the second hydroxyapatite column.            | 5 |
| <b>Figure S4.</b> SDS-PAGE of SULT2A1 at each step of the purification procedure. | 6 |

|                    | Volume | Total Activity | Total Protein | Specific Activity <sup>a</sup> |
|--------------------|--------|----------------|---------------|--------------------------------|
| Step               | (mL)   | (nmol/min)     | (mg)          | (nmol/min/mg)                  |
| 1. Cell Extract    | 20     | 16700          | 1000          | 16.7                           |
| 2. DE52            | 18     | 14000          | 391           | 35.9                           |
| 3. Hydroxyapatite1 | 27     | 6890           | 113           | 60                             |
| 4. Hydroxyapatite2 | 17     | 2910           | 36            | 80                             |

**Table S1.** Summary of the purification of hSULT2A1.

<sup>a</sup> Specific activity refers to the sulfation of dehydroepiandrosterone (DHEA) at pH 5.5. Assay mixtures containing 50  $\mu$ M DHEA, 200  $\mu$ M PAPS, 7.5 mM 2-mercaptoethanol, 10-30  $\mu$ l of protein obtained after each step and 0.25 mM sodium acetate buffer were incubated at 37°C for 30 min.

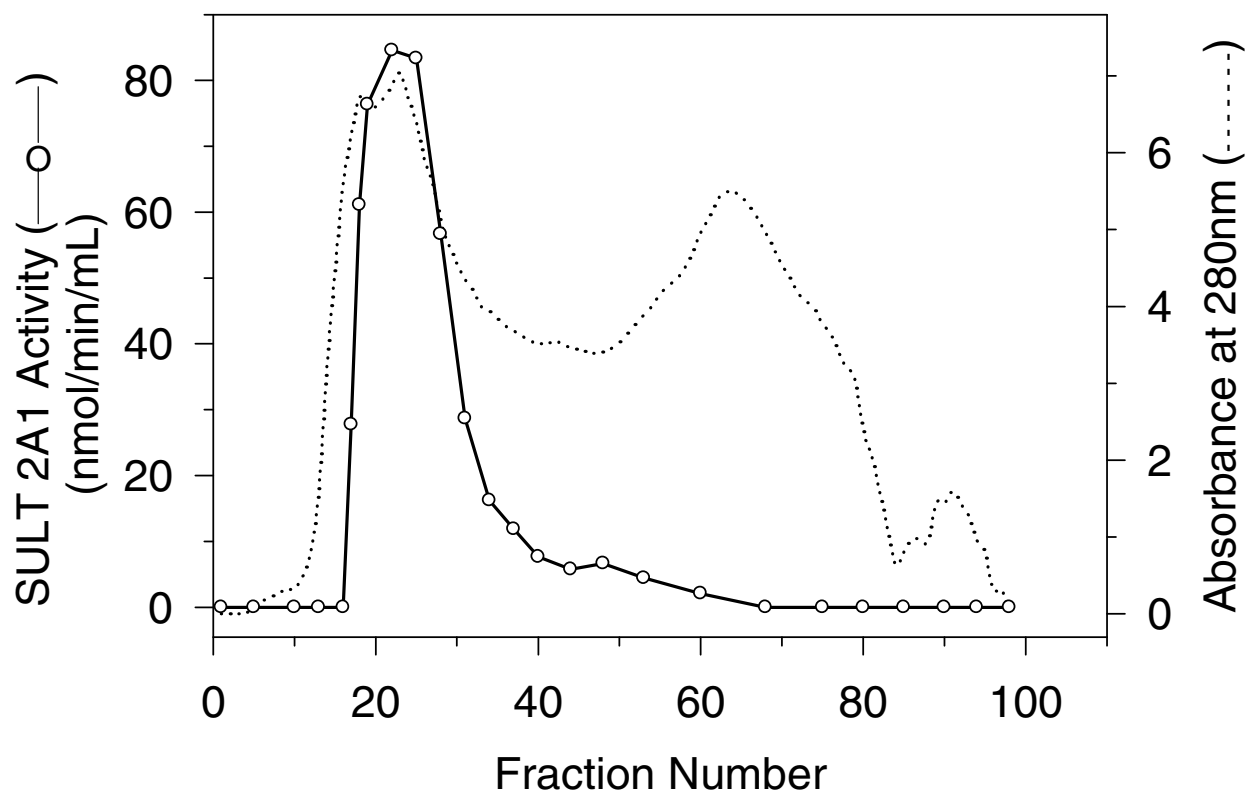

**Figure S1.** Elution profile of DE-52 column following initial removal of non-binding protein. The dashed line represents general protein absorbance recorded at 280 nm, and the solid line indicates the enzymatic activity of hSULT2A1 at pH 5.5 with 50  $\mu$ M DHEA as substrate.

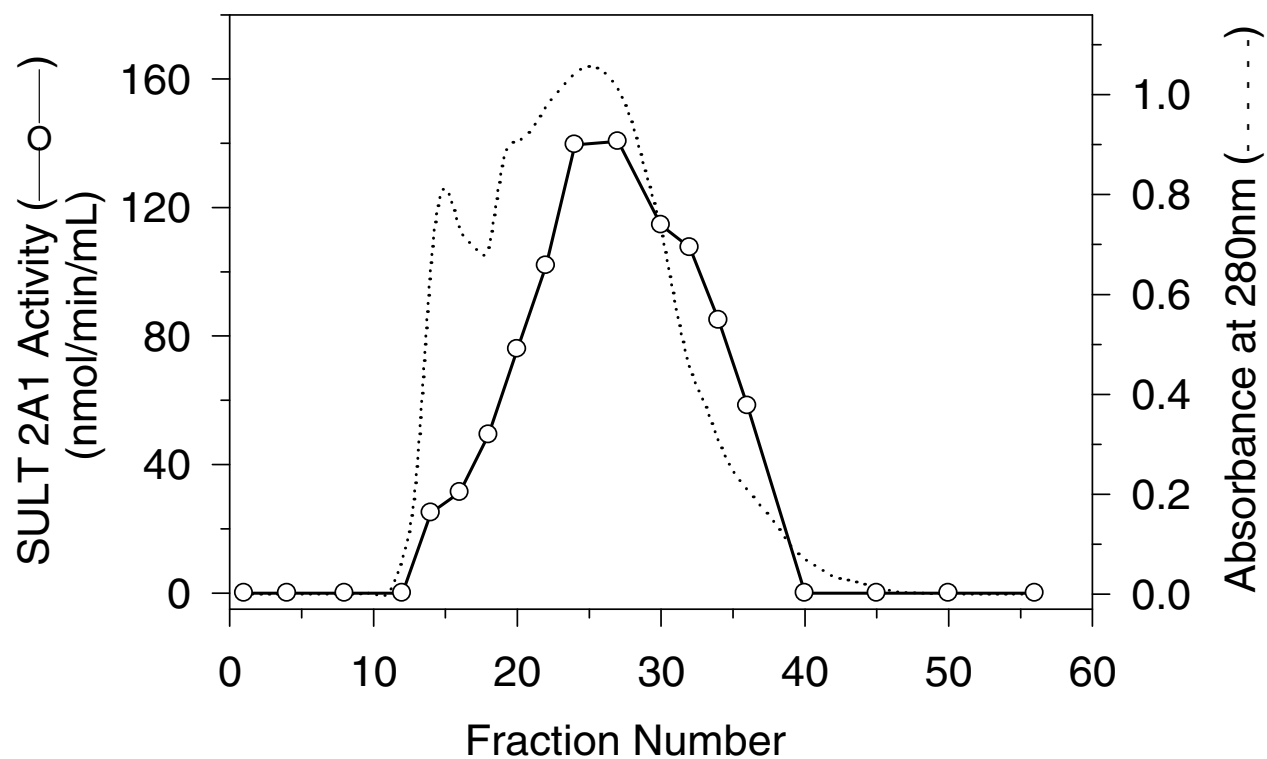

**Figure S2.** Elution profile of the first hydroxyapatite column following initial removal of non-binding protein. The dashed line represents general protein absorbance recorded at 280 nm, and the solid line indicates the enzymatic activity of hSULT2A1 at pH 5.5 with 50  $\mu$ M DHEA as substrate.

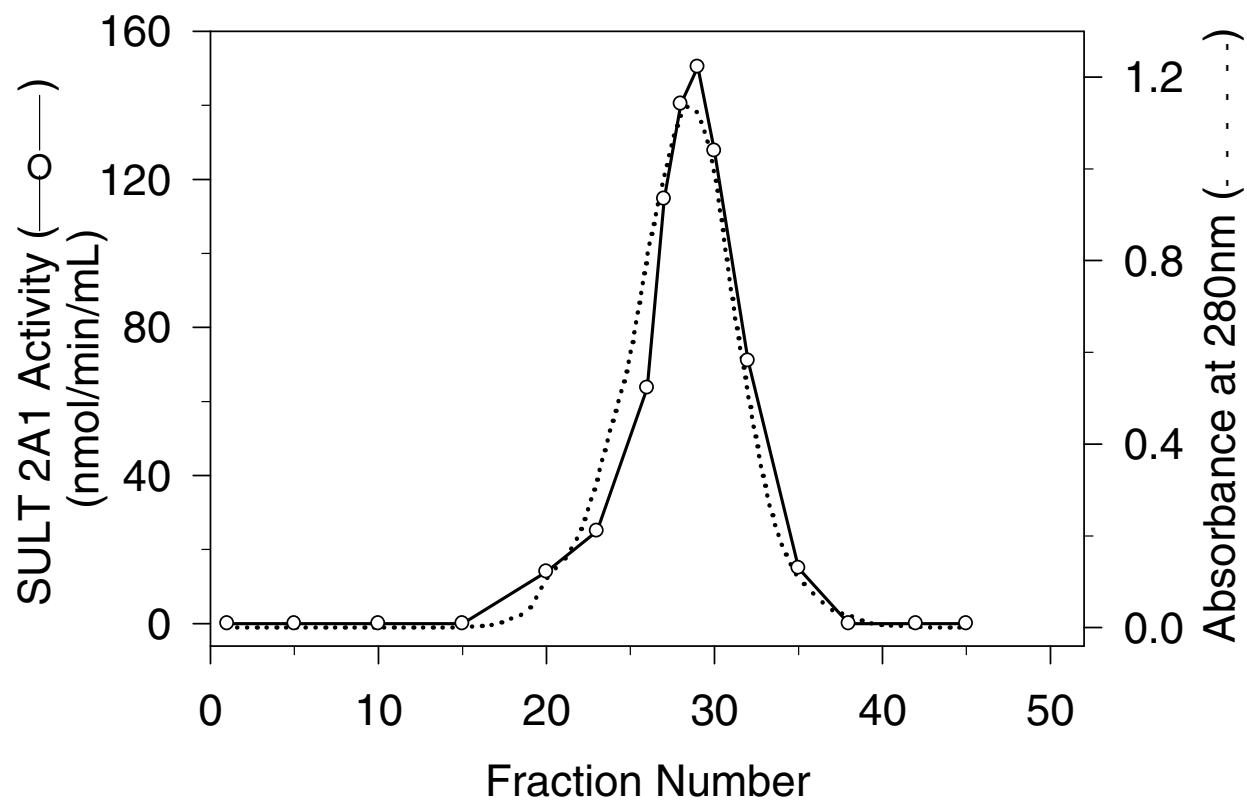

**Figure S3.** Elution profile of the second hydroxyapatite column following initial removal of non-binding protein. The dashed line represents general protein absorbance recorded at 280 nm, and the solid line indicates the enzymatic activity of hSULT2A1 at pH 5.5 with 50  $\mu$ M DHEA as substrate.

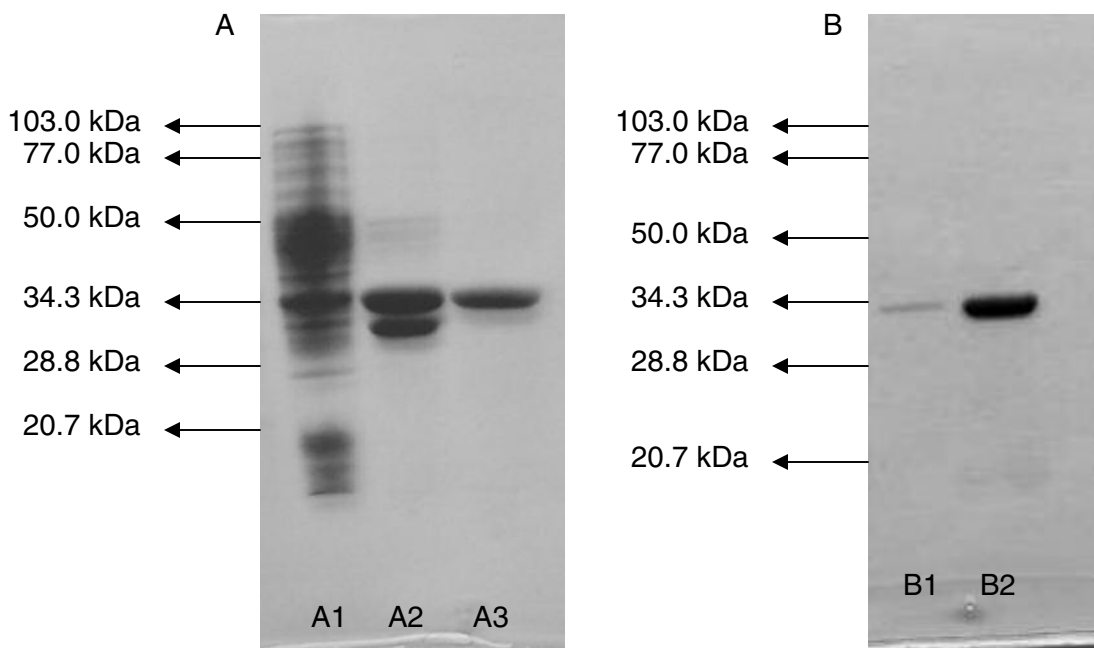

**Figure S4.** SDS-PAGE of hSULT2A1 at each step of the purification procedure. Part A: SDS-PAGE results obtained after each purification step; A1, Cell extract; A2, DE52 column; A3, 1<sup>st</sup> Hydroxyapatite column. Part B: SDS-PAGE results for the purified enzyme after the second hydroxyapatite column; B1, Purified enzyme (1μg); B2, Purified enzyme (5μg).
